# Supplementary material for: Formation mechanism and cytocompatibility of nano-shaped calcium silicate hydrate/calcium titanium silicate/TiO2 composite coatings on titanium
Source: Royal Society of Chemistry journal article supplement (doi:10.1039/c6tb01699e), 2016-01-01
Supplement: c6tb01699e1.pdf [file c6tb01699e1.pdf]

## Supporting information

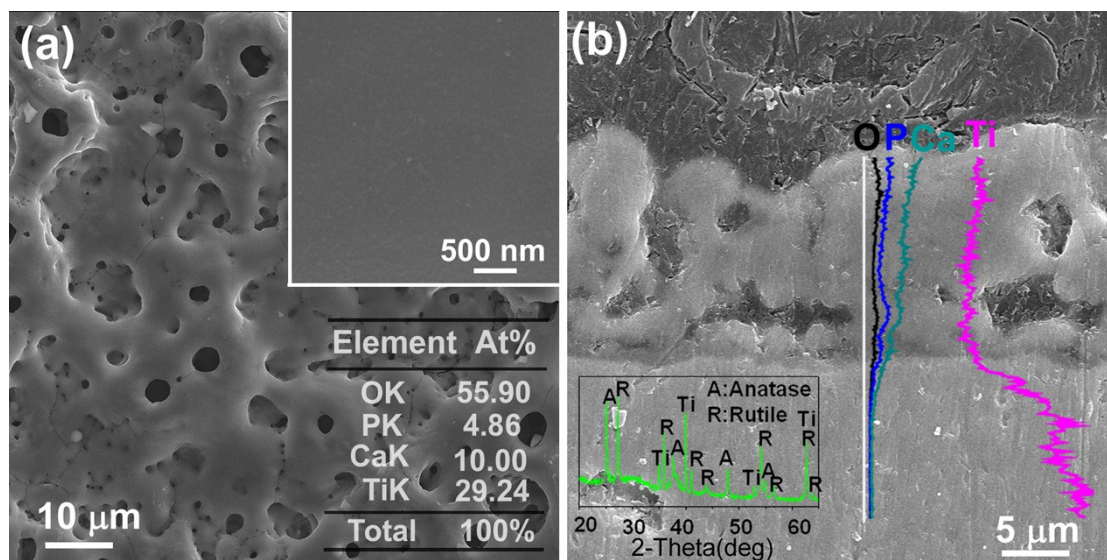

**Figure S1.** (a) surface and (b) cross-sectional SEM morphologies of the as-MAOed TiO<sub>2</sub> coating; insets in (a) showing the magnified image and element contents, insets in (b) showing the XRD pattern and EDX-detected element profiles.

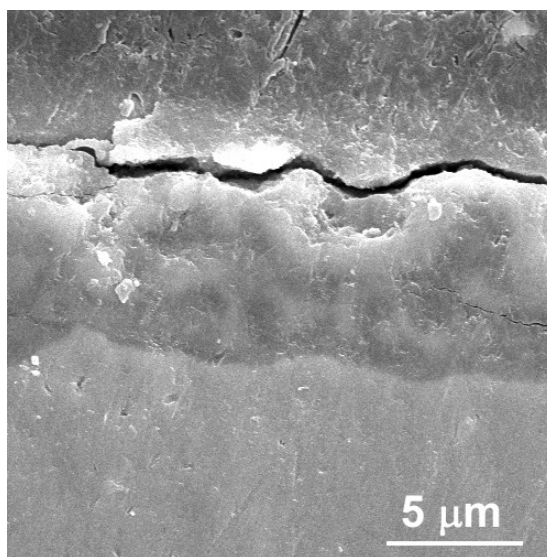

**Figure S2.** Cross-sectional SEM morphology of HT24h.
